# Supplementary material
Source: PubMed Central journal article supplement (PMC6167738)
Supplement: mmc1.pdf [file mmc1.pdf]

**Structure, Volume 26**

**Supplemental Information**

**Cork-in-Bottle Occlusion of Fluoride Ion  
Channels by Crystallization Chaperones**

**Benjamin C. McIlwain, Simon Newstead, and Randy B. Stockbridge**

## Supplemental Kinetic Data for Figure 2

Table S1. Time and rate constants for monobody block

|    | $\tau_B$ (sec)    | $k_{\text{off}}$ ( $\text{s}^{-1}$ ) | $\tau_O$ (sec)                    | $k_{\text{on}}$ ( $\text{s}^{-1} \text{M}^{-1}$ ) | $K_d$       |
|----|-------------------|--------------------------------------|-----------------------------------|---------------------------------------------------|-------------|
| L3 | 19.6 $\pm$ 0.10   | 0.05                                 | 9.4 $\pm$ 0.022 (with 300 nM Mb)  | 3.5 x 10 <sup>5</sup>                             | 135 nM      |
| S8 | 0.021 $\pm$ 0.003 | 47.6                                 | 2.0 $\pm$ 0.6 (with 2 $\mu$ M Mb) | 2.5 x 10 <sup>5</sup>                             | 190 $\mu$ M |
